# Supplementary material
Source: PubMed Central journal article supplement (PMC7520911)
Supplement: Suppl_TableS1.pdf [file Suppl_TableS1.pdf]

SUPPLEMENTARY TABLE S1. ASSOCIATION OF DEMOGRAPHIC, SOCIOECONOMIC, AND CLINICAL FACTORS WITH LOW- OR HIGH-RISK PERCEPTION AT 3 MONTHS POSTPARTUM

| <i>Variable, n (%)</i>             | <i>Low risk (risk score &lt;30, n=45)</i> | <i>High risk (risk score ≥30, n=33)</i> | <i>Adjusted odds ratio (CI)</i> |
|------------------------------------|-------------------------------------------|-----------------------------------------|---------------------------------|
| Age ≥30                            | 23 (51.1)                                 | 21 (63.6)                               | 1.0 (0.97–1.0)                  |
| BMI ≥30                            | 17 (37.8)                                 | 15 (45.5)                               | 1.0 (0.98–1.1)                  |
| Non-white race                     | 28 (62.2)                                 | 18 (54.5)                               | 0.6 (0.2–2.3)                   |
| Noncommercial insurance            | 20 (44.4)                                 | 11 (33.3)                               | 0.4 (0.1–2.2)                   |
| Education GED or less              | 8 (17.8)                                  | 9 (27.3)                                | 3.4 (0.8–14.5)                  |
| Health advice received             | 16 (35.6)                                 | 13 (39.4)                               | 1.3 (0.5–3.56)                  |
| Preeclampsia versus GDM            | 24 (53.3)                                 | 21 (63.6)                               | 0.6 (0.2–1.8)                   |
| Primary care established           | 33 (73.3)                                 | 22 (66.7)                               | 0.9 (0.3–2.7)                   |
| Postpartum depression <sup>a</sup> | 1 (2.2)                                   | 10 (30.3)                               | 20.5 (2.0–213.5)                |

Adjusted for age, BMI, race, insurance, education, and complication.

<sup>a</sup>EPDS of 14 or greater at 3 months postpartum.

BMI, body mass index; CI, confidence interval; EPDS, Edinburgh Postnatal Depression Scale; GDM, gestational diabetes mellitus.
